# Supplementary material for: Structural and spectroscopic characterisation of the spin crossover in [Fe(abpt)2(NCS)2] polymorph A
Source: Royal Society of Chemistry journal article supplement (doi:10.1039/c5nj02359a), 2016-01-01
Supplement: c5nj02359a1.pdf [file c5nj02359a1.pdf]

## New Journal of Chemistry - ESI

### Structural and spectroscopic characterisation of the spin crossover in [Fe(abpt)<sub>2</sub>(NCS)<sub>2</sub>] polymorph A

Helen E. Mason,<sup>a</sup> Wei Li,<sup>b</sup> Michael A. Carpenter,<sup>c</sup> Michelle L. Hamilton,<sup>d</sup> Judith A. K. Howard<sup>a</sup> and Hazel A. Sparkes<sup>e,\*</sup>

- a. Department of Chemistry, Durham University, South Road, Durham, DH1 3LE, UK.  
b. School of Physics and Wuhan National High Magnetic Field Center, Huazhong University of Science and Technology, Wuhan 430074, China.  
c. Department of Earth Sciences, University of Cambridge, Downing Street, Cambridge, CB2 3EQ, UK.  
d. RAL Space, STFC, Rutherford Appleton Laboratory, Didcot, OX11 0QX, UK.  
e. Department of Chemistry, University of Bristol, Cantock's Close, Bristol, BS8 1TS, UK. Email hazel.sparkes@bristol.ac.uk

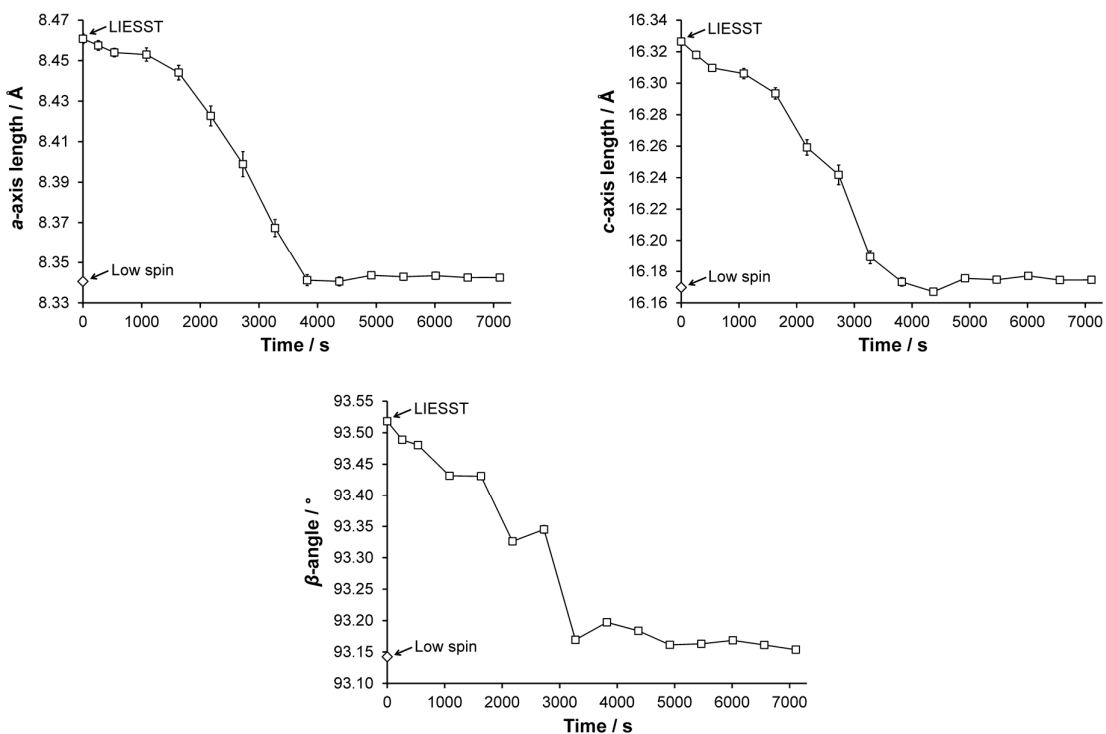

Figure S1 - Illustration of the change in the  $a$ -axis,  $b$ -axis and  $\beta$ -angle as a function of time at 30 K as a result of the relaxation of the LIESST HS\* state. Note: Each data point is plotted at the time mid-point of its two consecutive omega runs, therefore an error between +/- (535 to 538) s is associated with all data points except the 1st data point after turning the laser off (at 262 s) where the error is +/- 262 s.

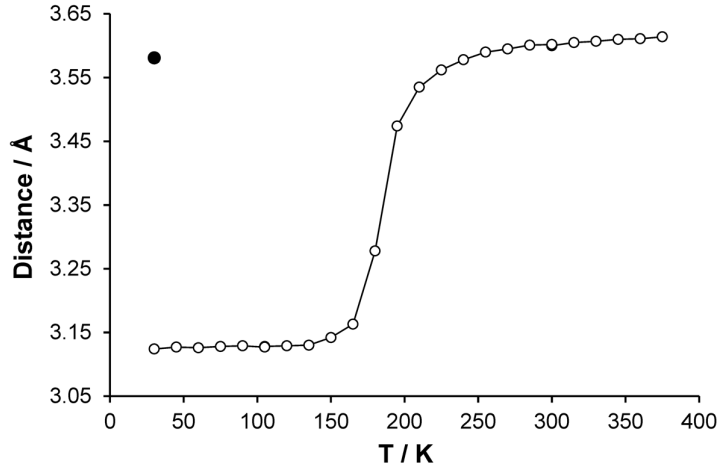

Figure S2 - Change in D...A distance for the C2-H2...N4#1 (#1 = -x+1, -y+1, -z+1) hydrogen bond in **A**: (o) as a function of temperature, (●) LIESST HS\* structure.

## Strain analysis

Values of the individual strains were obtained by first fitting a function of the form

$$a_o = a_1 + a_2 \Theta_s \coth\left(\frac{\Theta_s}{T}\right) \quad (S1)$$

to lattice parameters in a temperature range well above the HS to LS transition. Extrapolation to low temperatures of the fit gives the reference parameters,  $a_o$ ,  $b_o$ ,  $(c \sin \beta)_o$  and  $(\cos \beta^*)_o$ . The saturation temperature,  $\Theta_s$ , gives the correct form for approaching  $T = 0$  K with zero slope. Linear strains are then given by (after Carpenter *et al.*, *Eur. J. Mineral.*, 1998, **10**, 621-691)

$$e_1 = \frac{a - a_o}{a_o} \quad (S2)$$

$$e_2 = \frac{b - b_o}{b_o} \quad (S3)$$

$$e_3 = \frac{c \sin \beta - (c \sin \beta)_o}{(c \sin \beta)_o} \quad (S4)$$

and the non-zero shear strain is

$$e_5 \approx \frac{\cos \beta^* - (\cos \beta^*)_o}{(\cos \beta^*)_o} \quad (S5)$$

A value of  $\Theta_s = 90$  K was found to give a good representation of the four baselines shown in Figure S3(a)-(d) and ties in well with the single data point for the HS\* state at 30 K. The same procedure can be followed for the volume strain,  $V_s$ , (Fig. S3(e)) which is given by

$$V_s = \frac{V - V_o}{V_o} \quad (S6)$$

The resulting values of all the strains are shown as a function of temperature in Figure S3(f).

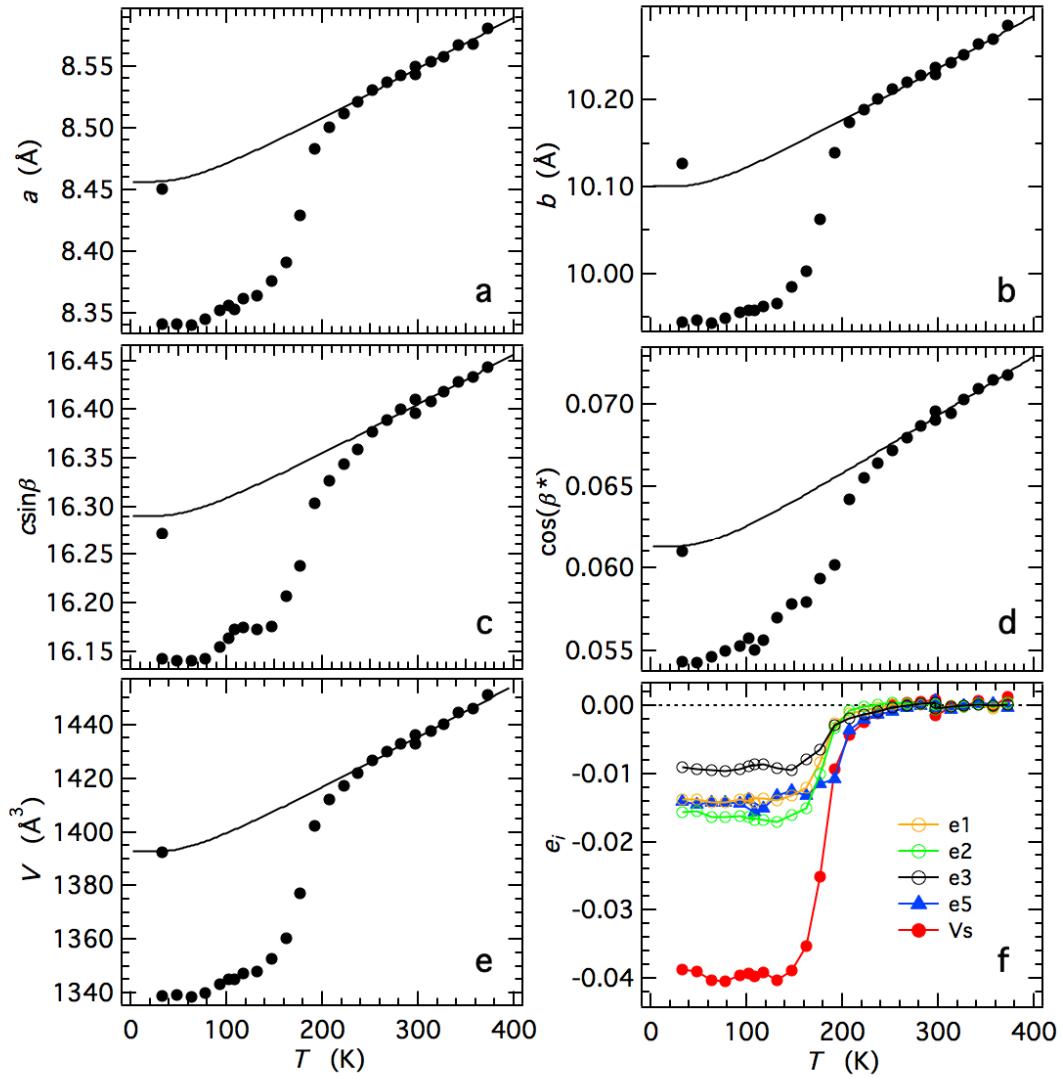

Figure S3 - Strain analysis from lattice parameter data. The solid curves in (a) – (e) are baseline ( $a_0$ ,  $b_0$ ,  $c_0$ , etc) fits to the highest temperature data using Equation S1, with the value of  $\Theta_s = 90$  K giving a good fit and passing through the 30 K data point for the high spin state induced by laser irradiation. (f) Strains determined using Equations S2-6.

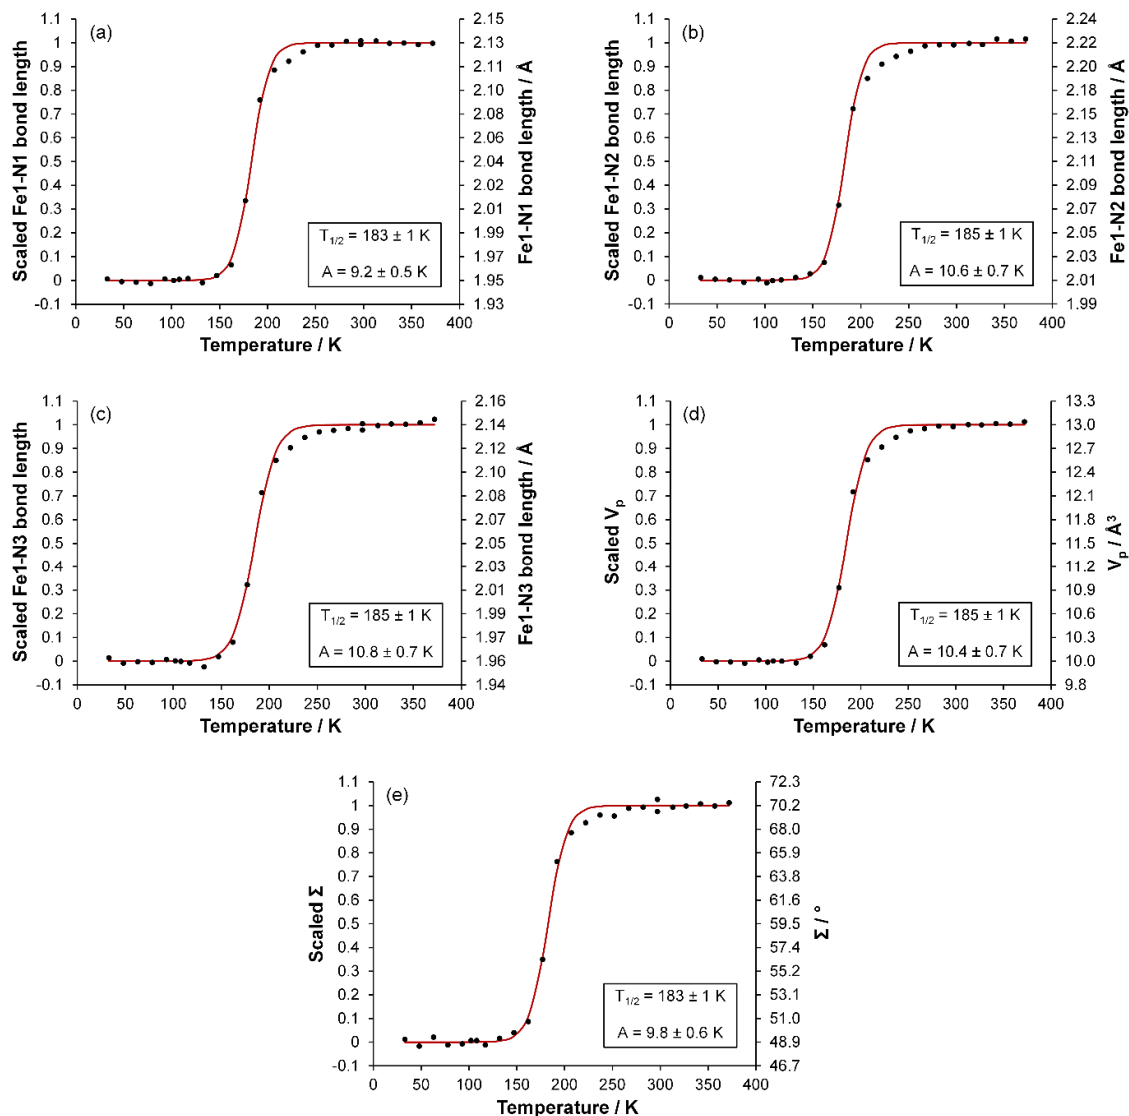

Figure S4 - Change in crystallographic parameters (rescaled to values between 0 and 1) as a function of temperature: (a)-(c) Fe-N bond lengths, (d) the volume of the Fe octahedron ( $V_p$ ) and (e) the distortion parameter ( $\Sigma$ , the sum of the absolute value of the deviation of all 12 *cis* N-Fe-N angles from 90°). The red curve illustrates the fit of a sigmoidal function based on Equation 4 and the fit parameters,  $T_{1/2}$  and  $A$ , are shown on each individual plot. Note: The sigmoid is not a perfect fit to the data, there is a slight deviation just above  $T_{1/2}$  and this will influence the fit parameters.

Table S1 - Crystal data and refinement results for [Fe(abpt)<sub>2</sub>(NCS)<sub>2</sub>] polymorph A at 120 K, 150 K, 165 K, 180 K and 210 K.

|                                                                   | <b>120(2) K (LS)</b>                                               | <b>150(2) K</b>                                                     | <b>165(2) K</b>                                                    | <b>180(2) K</b>                                                    | <b>210(2) K</b>                                                     |
|-------------------------------------------------------------------|--------------------------------------------------------------------|---------------------------------------------------------------------|--------------------------------------------------------------------|--------------------------------------------------------------------|---------------------------------------------------------------------|
| Empirical formula                                                 | C <sub>26</sub> H <sub>20</sub> FeN <sub>14</sub> S <sub>2</sub>   | C <sub>26</sub> H <sub>20</sub> FeN <sub>14</sub> S <sub>2</sub>    | C <sub>26</sub> H <sub>20</sub> FeN <sub>14</sub> S <sub>2</sub>   | C <sub>26</sub> H <sub>20</sub> FeN <sub>14</sub> S <sub>2</sub>   | C <sub>26</sub> H <sub>20</sub> FeN <sub>14</sub> S <sub>2</sub>    |
| Formula weight                                                    | 648.53                                                             | 648.53                                                              | 648.53                                                             | 648.53                                                             | 648.53                                                              |
| $\lambda$ (Å)                                                     | 0.71073                                                            | 0.71073                                                             | 0.71073                                                            | 0.71073                                                            | 0.71073                                                             |
| Crystal system                                                    | Monoclinic                                                         | Monoclinic                                                          | Monoclinic                                                         | Monoclinic                                                         | Monoclinic                                                          |
| Space group                                                       | <i>P</i> 2 <sub>1</sub> / <i>n</i>                                 | <i>P</i> 2 <sub>1</sub> / <i>n</i>                                  | <i>P</i> 2 <sub>1</sub> / <i>n</i>                                 | <i>P</i> 2 <sub>1</sub> / <i>n</i>                                 | <i>P</i> 2 <sub>1</sub> / <i>n</i>                                  |
| <i>a</i> (Å)                                                      | 8.3636(8)                                                          | 8.3770(9)                                                           | 8.3913(4)                                                          | 8.4290(4)                                                          | 8.5008(3)                                                           |
| <i>b</i> (Å)                                                      | 9.9597(10)                                                         | 9.9820(11)                                                          | 10.0025(5)                                                         | 10.0626(5)                                                         | 10.1744(4)                                                          |
| <i>c</i> (Å)                                                      | 16.198(2)                                                          | 16.198(2)                                                           | 16.2339(8)                                                         | 16.2671(8)                                                         | 16.3606(6)                                                          |
| $\beta$ (°)                                                       | 93.114(2)                                                          | 93.306(2)                                                           | 93.321(1)                                                          | 93.402(1)                                                          | 93.684(1)                                                           |
| <i>V</i> (Å <sup>3</sup> )                                        | 1347.3(2)                                                          | 1352.2(3)                                                           | 1360.29(12)                                                        | 1377.31(12)                                                        | 1412.11(9)                                                          |
| <i>Z</i>                                                          | 2                                                                  | 2                                                                   | 2                                                                  | 2                                                                  | 2                                                                   |
| Temperature (K)                                                   | 120(2)                                                             | 150(2)                                                              | 165(2)                                                             | 180(2)                                                             | 210(2)                                                              |
| <i>D<sub>c</sub></i> (Mg m <sup>-3</sup> )                        | 1.599                                                              | 1.593                                                               | 1.583                                                              | 1.564                                                              | 1.525                                                               |
| $\mu$ (mm <sup>-1</sup> )                                         | 0.763                                                              | 0.760                                                               | 0.756                                                              | 0.746                                                              | 0.728                                                               |
| <i>F</i> (000)                                                    | 664                                                                | 664                                                                 | 664                                                                | 664                                                                | 664                                                                 |
| Crystal size (mm <sup>3</sup> )                                   | 0.36 x 0.30 x 0.26                                                 | 0.36 x 0.30 x 0.26                                                  | 0.36 x 0.30 x 0.26                                                 | 0.36 x 0.30 x 0.26                                                 | 0.36 x 0.30 x 0.26                                                  |
| $\theta$ range for data collection (°)                            | 2.40 - 28.28                                                       | 2.40 - 28.29                                                        | 2.39 - 28.27                                                       | 2.38 - 28.28                                                       | 2.36 - 28.30                                                        |
| Ranges of <i>h</i> , <i>k</i> , <i>l</i>                          | -10 ≤ <i>h</i> ≤ 11,<br>-13 ≤ <i>k</i> ≤ 9,<br>-21 ≤ <i>l</i> ≤ 15 | -11 ≤ <i>h</i> ≤ 11,<br>-13 ≤ <i>k</i> ≤ 12,<br>-21 ≤ <i>l</i> ≤ 21 | -10 ≤ <i>h</i> ≤ 11,<br>-13 ≤ <i>k</i> ≤ 9,<br>-21 ≤ <i>l</i> ≤ 15 | -11 ≤ <i>h</i> ≤ 10,<br>-13 ≤ <i>k</i> ≤ 9,<br>-16 ≤ <i>l</i> ≤ 21 | -11 ≤ <i>h</i> ≤ 11,<br>-13 ≤ <i>k</i> ≤ 13,<br>-21 ≤ <i>l</i> ≤ 21 |
| Refl. collected                                                   | 9018                                                               | 14820                                                               | 9138                                                               | 9303                                                               | 15676                                                               |
| <i>R</i> <sub>int</sub>                                           | 0.0312                                                             | 0.0336                                                              | 0.0288                                                             | 0.0309                                                             | 0.0340                                                              |
| Data/parameters                                                   | 3333/202                                                           | 3357/202                                                            | 3374/202                                                           | 3428/202                                                           | 3521/202                                                            |
| Absorption coef. min/max<br>Goof ( <i>F</i> <sup>2</sup> )        | 0.756/1.000<br>1.040                                               | 0.825/1.000<br>1.043                                                | 0.732/1.000<br>1.022                                               | 0.844/1.000<br>1.034                                               | 0.870/1.000<br>1.044                                                |
| Final <i>R</i> <sub>1</sub> [ <i>I</i> > 2 $\sigma$ ( <i>I</i> )] | 0.0328                                                             | 0.0293                                                              | 0.0311                                                             | 0.0335                                                             | 0.0320                                                              |
| <i>wR</i> <sub>2</sub> [ <i>I</i> > 2 $\sigma$ ( <i>I</i> )]      | 0.0762                                                             | 0.0700                                                              | 0.0697                                                             | 0.0760                                                             | 0.0767                                                              |
| Largest diff. peak/hole (e Å <sup>-3</sup> )                      | 0.36/-0.41                                                         | 0.34/-0.33                                                          | 0.33/-0.33                                                         | 0.32/-0.27                                                         | 0.37/-0.37                                                          |

Table S2 - Hydrogen bonds for [Fe(abpt)<sub>2</sub>(NCS)<sub>2</sub>] polymorph **A**. Symmetry transformations used to generate equivalent atoms: #1 =  $x+1/2, -y+3/2, z+1/2$ ; #2 =  $-x+1, -y+1, -z+1$ .

| D-H...A       |              | <b>270(2) K</b> | <b>210(2) K</b> | <b>180(2) K</b> | <b>165(2) K</b> | <b>150(2) K</b> | <b>120(2) K</b> |
|---------------|--------------|-----------------|-----------------|-----------------|-----------------|-----------------|-----------------|
| N6-H6B...N7   | d(D-H) (Å)   | 0.93(2)         | 0.89(2)         | 0.87(2)         | 0.89(2)         | 0.88(2)         | 0.91(2)         |
|               | d(H...A) (Å) | 2.12(2)         | 2.13(2)         | 2.17(2)         | 2.13(2)         | 2.16(2)         | 2.13(2)         |
|               | d(D...A) (Å) | 2.847(3)        | 2.851(2)        | 2.851(2)        | 2.850(2)        | 2.850(2)        | 2.851(2)        |
|               | <(DHA) (°)   | 135(2)          | 137.4(19)       | 135(2)          | 138.4(19)       | 135.3(18)       | 136.1(19)       |
| N6-H6A...S1#1 | d(D-H) (Å)   | 0.89(2)         | 0.93(2)         | 0.93(2)         | 0.93(2)         | 0.92(2)         | 0.93(2)         |
|               | d(H...A) (Å) | 2.69(2)         | 2.65(2)         | 2.60(2)         | 2.59(2)         | 2.61(2)         | 2.61(2)         |
|               | d(D...A) (Å) | 3.450(2)        | 3.4314(19)      | 3.403(2)        | 3.3958(18)      | 3.3890(17)      | 3.3862(18)      |
|               | <(DHA) (°)   | 143.1(19)       | 142.1(17)       | 144.2(18)       | 144.5(17)       | 142.4(17)       | 142.1(18)       |
| C2-H2...N4#2  | d(D-H) (Å)   | 0.93            | 0.94            | 0.95            | 0.95            | 0.95            | 0.95            |
|               | d(H...A) (Å) | 2.82            | 2.75            | 2.49            | 2.38            | 2.36            | 2.35            |
|               | d(D...A) (Å) | 3.596(3)        | 3.536(3)        | 3.279(3)        | 3.163(2)        | 3.142(2)        | 3.128(2)        |
|               | <(DHA) (°)   | 142.2           | 141.6           | 140.6           | 140             | 139.6           | 139.3           |

| D-H...A       |              | <b>30(2) K</b> | <b>30(2) K<br/>LIESST</b> | <b>296 K,<br/>ambient</b> | <b>296 K,<br/>1.4(2) kbar</b> | <b>296 K,<br/>5.1(2) kbar</b> |
|---------------|--------------|----------------|---------------------------|---------------------------|-------------------------------|-------------------------------|
| N6-H6B...N7   | d(D-H) (Å)   | 0.88(2)        | 0.90(2)                   | 0.86(2)                   | 0.87(2)                       | 0.86(2)                       |
|               | d(H...A) (Å) | 2.16(2)        | 2.11(2)                   | 2.12(6)                   | 2.29(7)                       | 2.22(5)                       |
|               | d(D...A) (Å) | 2.853(2)       | 2.852(2)                  | 2.841(10)                 | 2.839(8)                      | 2.847(7)                      |
|               | <(DHA) (°)   | 134.5(19)      | 139.4(17)                 | 141(9)                    | 122(6)                        | 130(5)                        |
| N6-H6A...S1#1 | d(D-H) (Å)   | 0.89(2)        | 0.93(2)                   | 0.87(2)                   | 0.867(19)                     | 0.882(19)                     |
|               | d(H...A) (Å) | 2.61(2)        | 2.63(2)                   | 2.80(7)                   | 2.75(5)                       | 2.70(5)                       |
|               | d(D...A) (Å) | 3.3814(18)     | 3.4170(15)                | 3.482(9)                  | 3.437(7)                      | 3.382(6)                      |
|               | <(DHA) (°)   | 145.0(19)      | 143.0(15)                 | 137(8)                    | 138(6)                        | 136(5)                        |
| C2-H2...N4#2  | d(D-H) (Å)   | 0.95           | 0.95                      | 0.93                      | 0.93                          | 0.93                          |
|               | d(H...A) (Å) | 2.34           | 2.79                      | 2.81                      | 2.77                          | 2.44                          |
|               | d(D...A) (Å) | 3.124(2)       | 3.580(2)                  | 3.579(13)                 | 3.551(11)                     | 3.215(11)                     |
|               | <(DHA) (°)   | 139.6          | 141.8                     | 141                       | 142.7                         | 140.4                         |
